# Supplementary material for: TROPESS/CrIS carbon monoxide profile validation with NOAA GML and ATom in situ aircraft observations
Source: Copernicus journal article supplement (doi:10.5194/amt-15-5383-2022), 2022-09-22
Supplement: Supplementary file 1 [file amt-15-5383-2022-supplement.pdf]

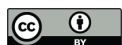

*Supplement of*

## **TROCESS/CrIS carbon monoxide profile validation with NOAA GML and ATom in situ aircraft observations**

**Helen M. Worden et al.**

*Correspondence to:* Helen M. Worden ([hmw@ucar.edu](mailto:hmw@ucar.edu))

The copyright of individual parts of the supplement might differ from the article licence.

# Supplementary Figures for Worden et al., TROPESS/CrIS carbon monoxide profile validation with NOAA GML and ATom in situ aircraft observations

The following figures provide additional information to Sec. 5.3, Dependence on CO amount.

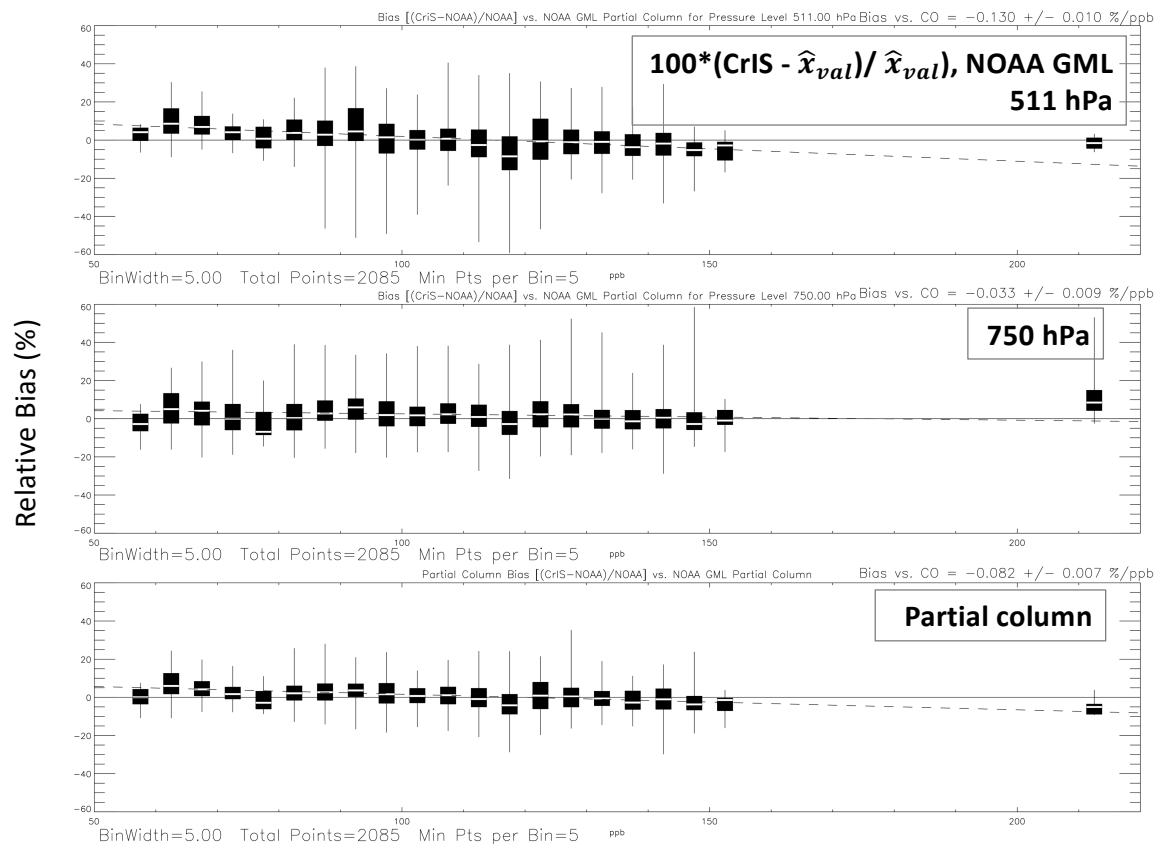

**Figure S1.** Bias of CrIS CO vs CO amount for NOAA GML flights at 511 hPa (top panel), 750 hPa (middle panel) and the partial column corresponding to the aircraft pressure range (bottom panel). Note the bottom panel is shown in Fig. 10.

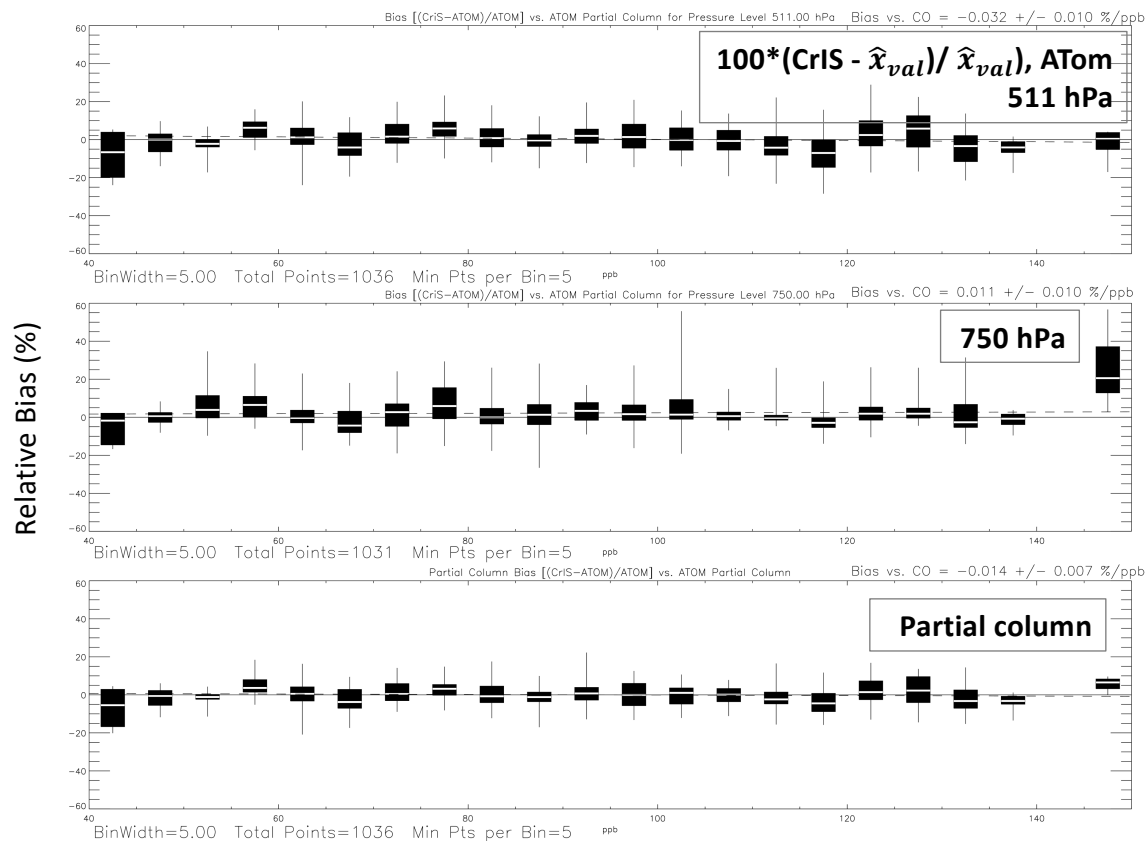

**Figure S2.** Bias of CrIS CO vs CO amount for ATom flights at 511 hPa (top panel), 750 hPa (middle panel) and the partial column corresponding to the aircraft profile pressure range (bottom panel). Note the bottom panel is shown in Fig. 10.
